# Supplementary material
Source: PubMed Central journal article supplement (PMC3585085)
Supplement: supp_M112.412130_jbc.M112.412130-1.pdf [file supp_M112.412130_jbc.M112.412130-1.pdf]

## Supplemental Data

### Supplemental Tables

Supplemental Table 1: Sarcomere Length (SL) shortening (% of baseline)

|                                           | [Drug]  | 0.5 Hz     |    | 1 Hz       |    | 2 Hz       |    | 3 Hz       |    | 4 Hz       |    | Two-way ANOVA<br>vs. NOS1 <sup>-/-</sup> |
|-------------------------------------------|---------|------------|----|------------|----|------------|----|------------|----|------------|----|------------------------------------------|
|                                           | (mM)    | Mean ± SEM | N  |                                          |
| WT                                        | —       | 4.8 ± 0.3  | 41 | 5.3 ± 0.4  | 39 | 6.9 ± 0.5  | 38 | 8.4 ± 0.5  | 38 | 9.3 ± 0.5  | 34 | p < 0.0001                               |
| NOS1 <sup>-/-</sup> (1 <sup>st</sup> set) | —       | 4.3 ± 0.3  | 54 | 4.5 ± 0.3  | 58 | 5.2 ± 0.3  | 59 | 6.1 ± 0.4  | 56 | 5.9 ± 0.4  | 50 | ————                                     |
| NOS1 <sup>-/-</sup> + HYD                 | 0.1     | 3.7 ± 0.5  | 11 | 4.1 ± 0.4  | 12 | 6.1 ± 0.8  | 13 | 7.0 ± 1.1  | 10 | 6.8 ± 0.8  | 8  | p = 0.395                                |
| NOS1 <sup>-/-</sup> + HYD                 | 1       | 4.5 ± 0.6  | 11 | 5.5 ± 1.0  | 11 | 8.1 ± 1.2  | 11 | 8.7 ± 1.2  | 10 | 7.7 ± 0.8  | 8  | p < 0.0001                               |
| NOS1 <sup>-/-</sup> + HYD                 | 10      | 5.1 ± 1.0  | 7  | 5.9 ± 1.5  | 6  | 7.2 ± 1.0  | 8  | 8.7 ± 1.0  | 7  | 8.3 ± 0.7  | 4  | p < 0.0001                               |
| NOS1 <sup>-/-</sup> + NTG                 | 0.1     | 3.0 ± 1.1  | 4  | 3.4 ± 1.3  | 4  | 5.5 ± 1.4  | 2  | 6.2 ± 2.0  | 4  | 5.3 ± 1.8  | 4  | p = 0.579                                |
| NOS1 <sup>-/-</sup> + NTG                 | 1       | 3.8 ± 0.8  | 8  | 4.4 ± 1.2  | 8  | 5.7 ± 1.5  | 8  | 6.2 ± 1.7  | 5  | 6.8 ± 2.3  | 4  | p = 0.745                                |
| NOS1 <sup>-/-</sup> + NTG                 | 10      | 3.6 ± 0.7  | 12 | 3.6 ± 0.6  | 13 | 4.6 ± 0.8  | 13 | 5.9 ± 1.2  | 13 | 6.0 ± 1.3  | 9  | p = 0.228                                |
| NOS1 <sup>-/-</sup> + HYD+NTG             | 0.1+0.1 | 3.5 ± 0.6  | 8  | 3.5 ± 0.7  | 8  | 5.1 ± 1.0  | 8  | 6.4 ± 0.8  | 8  | 6.9 ± 0.7  | 8  | p = 0.777                                |
| NOS1 <sup>-/-</sup> + HYD+NTG             | 0.5+0.5 | 4.3 ± 0.6  | 8  | 5.2 ± 0.8  | 9  | 6.6 ± 1.0  | 9  | 8.1 ± 1.1  | 9  | 7.5 ± 0.7  | 6  | p = 0.008                                |
| NOS1 <sup>-/-</sup> + HYD+NTG             | 10+10   | 4.3 ± 0.7  | 8  | 4.6 ± 0.7  | 9  | 6.4 ± 1.0  | 10 | 8.5 ± 1.0  | 10 | 8.4 ± 1.3  | 7  | p = 0.004                                |
| NOS1 <sup>-/-</sup> (2 <sup>nd</sup> set) | —       | 4.4 ± 0.3  | 7  | 4.6 ± 0.3  | 7  | 5.3 ± 0.3  | 7  | 6.2 ± 0.4  | 7  | 6.0 ± 0.3  | 6  | ————                                     |
| NOS1 <sup>-/-</sup> + ISDN                | 10      | 5.0 ± 0.9  | 7  | 4.2 ± 0.5  | 9  | 5.6 ± 0.9  | 9  | 5.7 ± 0.9  | 10 | 6.2 ± 0.9  | 9  | p = 0.929                                |
| NOS1 <sup>-/-</sup> + HYD+ISDN            | 10+10   | 5.7 ± 0.8  | 8  | 5.1 ± 0.7  | 9  | 6.9 ± 1    | 9  | 7.3 ± 0.7  | 9  | 7.8 ± 0.6  | 11 | p = 0.004                                |

Supplemental Table 2: Cytosolic Ca<sup>2+</sup> transient amplitude ( $\Delta$ Ca<sup>2+</sup>, nM)

|                                           | [Drug]  | 0.5 Hz     |    | 1 Hz       |    | 2 Hz       |    | 3 Hz       |    | 4 Hz       |    | Two-way ANOVA<br>vs. NOS1 <sup>-/-</sup> |
|-------------------------------------------|---------|------------|----|------------|----|------------|----|------------|----|------------|----|------------------------------------------|
|                                           | (mM)    | Mean ± SEM | N  |                                          |
| WT                                        | —       | 160 ± 13   | 40 | 172 ± 16   | 38 | 211 ± 21   | 37 | 260 ± 28   | 36 | 316 ± 40   | 32 | p = 0.045                                |
| NOS1 <sup>-/-</sup> (1 <sup>st</sup> set) | —       | 229 ± 16   | 50 | 229 ± 17   | 48 | 246 ± 16   | 49 | 268 ± 19   | 48 | 278 ± 21   | 40 | ————                                     |
| NOS1 <sup>-/-</sup> + HYD                 | 0.1     | 235 ± 23   | 12 | 230 ± 24   | 13 | 289 ± 32   | 14 | 280 ± 31   | 11 | 287 ± 33   | 9  | p = 0.406                                |
| NOS1 <sup>-/-</sup> + HYD                 | 1       | 266 ± 27   | 12 | 242 ± 23   | 12 | 266 ± 30   | 12 | 311 ± 36   | 10 | 334 ± 32   | 8  | p = 0.057                                |
| NOS1 <sup>-/-</sup> + HYD                 | 10      | 273 ± 21   | 6  | 270 ± 21   | 4  | 291 ± 39   | 7  | 362 ± 54   | 7  | 400 ± 82   | 5  | p = 0.004                                |
| NOS1 <sup>-/-</sup> + NTG                 | 0.1     | 248 ± 69   | 5  | 258 ± 97   | 5  | 241 ± 76   | 5  | 281 ± 132  | 5  | 304 ± 153  | 4  | p = 0.566                                |
| NOS1 <sup>-/-</sup> + NTG                 | 1       | 214 ± 18   | 12 | 231 ± 28   | 11 | 265 ± 30   | 11 | 251 ± 29   | 7  | 238 ± 26   | 6  | p = 0.592                                |
| NOS1 <sup>-/-</sup> + NTG                 | 10      | 196 ± 37   | 11 | 200 ± 31   | 12 | 217 ± 32   | 12 | 235 ± 35   | 12 | 190 ± 39   | 9  | p = 0.018                                |
| NOS1 <sup>-/-</sup> + HYD+NTG             | 0.1+0.1 | 239 ± 32   | 9  | 226 ± 33   | 9  | 255 ± 47   | 9  | 272 ± 53   | 9  | 307 ± 40   | 7  | p = 0.629                                |
| NOS1 <sup>-/-</sup> + HYD+NTG             | 0.5+0.5 | 264 ± 47   | 5  | 256 ± 49   | 5  | 298 ± 60   | 5  | 322 ± 61   | 6  | 329 ± 63   | 5  | p = 0.081                                |
| NOS1 <sup>-/-</sup> + HYD+NTG             | 10+10   | 196 ± 28   | 9  | 198 ± 27   | 12 | 240 ± 33   | 12 | 291 ± 42   | 12 | 358 ± 69   | 9  | p = 0.722                                |
| NOS1 <sup>-/-</sup> (2 <sup>nd</sup> set) | —       | 233 ± 14   | 7  | 235 ± 15   | 7  | 254 ± 15   | 7  | 275 ± 17   | 7  | 281 ± 19   | 6  | ————                                     |
| NOS1 <sup>-/-</sup> + ISDN                | 10      | 209 ± 35   | 8  | 176 ± 27   | 10 | 198 ± 27   | 10 | 207 ± 31   | 11 | 216 ± 42   | 10 | p = 0.005                                |
| NOS1 <sup>-/-</sup> + HYD+ISDN            | 10+10   | 214 ± 12   | 9  | 219 ± 17   | 11 | 239 ± 15   | 10 | 274 ± 17   | 11 | 293 ± 23   | 11 | p = 0.496                                |

Supplemental Table 3: Ca<sup>2+</sup> transient decay time constant ( $\tau$ ; msec)

|                                      | [Drug]  | 0.5 Hz     |    | 1 Hz       |    | 2 Hz       |    | 3 Hz       |    | 4 Hz       |    | Two-way ANOVA<br>vs. NOS1 <sup>-/-</sup> |
|--------------------------------------|---------|------------|----|------------|----|------------|----|------------|----|------------|----|------------------------------------------|
|                                      | (mM)    | Mean ± SEM | N  |                                          |
| (baseline to baseline <sup>1</sup> ) |         |            |    |            |    |            |    |            |    |            |    |                                          |
| WT                                   | —       | 198 ± 9    | 14 | 161 ± 6    | 14 | 142 ± 5    | 14 | 125 ± 7    | 12 | 91 ± 4     | 9  | p = 0.0003                               |
| NOS1 <sup>-/-</sup>                  | —       | 231 ± 13   | 17 | 184 ± 7    | 19 | 163 ± 12   | 18 | 143 ± 6    | 18 | 101 ± 6    | 13 | ————                                     |
| NOS1 <sup>-/-</sup> + HYD            | 0.1     | 228 ± 16   | 8  | 212 ± 18   | 10 | 171 ± 8    | 11 | 146 ± 11   | 9  | 89 ± 5     | 7  | p = 0.512                                |
| NOS1 <sup>-/-</sup> + HYD            | 1       | 225 ± 15   | 14 | 193 ± 16   | 19 | 157 ± 5    | 18 | 140 ± 5    | 16 | 96 ± 3     | 14 | p = 0.735                                |
| NOS1 <sup>-/-</sup> + HYD            | 10      | 177 ± 15   | 11 | 145 ± 13   | 8  | 117 ± 7    | 10 | 118 ± 12   | 8  | 9 ± 9      | 5  | p < 0.0001                               |
| NOS1 <sup>-/-</sup> + NTG            | 0.1     | 218 ± 12   | 5  | 181 ± 17   | 5  | 143 ± 16   | 5  | 124 ± 14   | 5  | 108 ± 15   | 3  | p = 0.295                                |
| NOS1 <sup>-/-</sup> + NTG            | 1       | 208 ± 9    | 12 | 165 ± 7    | 11 | 131 ± 9    | 11 | 131 ± 13   | 7  | 86 ± 9     | 6  | p = 0.003                                |
| NOS1 <sup>-/-</sup> + NTG            | 10      | 180 ± 7    | 10 | 156 ± 7    | 11 | 130 ± 4    | 11 | 127 ± 6    | 11 | 89 ± 6     | 7  | p < 0.0001                               |
| NOS1 <sup>-/-</sup> + HYD+NTG        | 0.1+0.1 | 235 ± 15   | 3  | 171 ± 9    | 9  | 136 ± 4    | 9  | 121 ± 3    | 5  | 105 ± 13   | 4  | p = 0.824                                |
| NOS1 <sup>-/-</sup> + HYD+NTG        | 0.5+0.5 | 227 ± 5    | 8  | 183 ± 7    | 9  | 162 ± 16   | 9  | 149 ± 13   | 7  | 93 ± 5     | 6  | p = 0.188                                |
| NOS1 <sup>-/-</sup> + HYD+NTG        | 10+10   | 177 ± 7    | 9  | 145 ± 8    | 12 | 124 ± 8    | 11 | 117 ± 11   | 12 | 89 ± 4     | 8  | p < 0.0001                               |
| (peak to baseline <sup>2</sup> )     |         |            |    |            |    |            |    |            |    |            |    |                                          |
| WT                                   | —       | 158 ± 6    | 29 | 141 ± 7    | 29 | 112 ± 6    | 28 | 93 ± 4     | 26 | 99 ± 6     | 25 | p < 0.0001                               |
| NOS1 <sup>-/-</sup>                  | —       | 183 ± 6    | 36 | 161 ± 7    | 33 | 123 ± 5    | 33 | 105 ± 4    | 31 | 109 ± 5    | 29 | ————                                     |
| NOS1 <sup>-/-</sup> + ISDN           | 10      | 130 ± 9    | 8  | 119 ± 7    | 10 | 106 ± 5    | 10 | 100 ± 5    | 10 | 95 ± 5     | 8  | p < 0.0001                               |
| NOS1 <sup>-/-</sup> + HYD+ISDN       | 10+10   | 128 ± 8    | 11 | 117 ± 13   | 11 | 102 ± 6    | 10 | 118 ± 8    | 9  | 119 ± 11   | 4  | p = 0.001                                |

<sup>1</sup> set of  $\tau$  measured from  $t_0$  of the Ca<sup>2+</sup> transient to baseline

<sup>2</sup> set of  $\tau$  measured from peak of the Ca<sup>2+</sup> transient to baseline
